# Supplementary material for: Structure of a (3+1) hybrid G-quadruplex in the PARP1 promoter
Source: PubMed Central journal article supplement (PMC6379715; doi:10.1093/nar/gky1179), 2018-12-15
Supplement: gky1179_supplemental_files.pdf [file gky1179_supplemental_files.pdf]

# Structure of a (3+1) hybrid G-quadruplex in the *PARP1* promoter

Anjali Sengar<sup>1#</sup>, J Jeya Vandana<sup>1#</sup>, Vicki S Chambers<sup>2</sup>, Marco Di Antonio<sup>2</sup>, Fernaldo Richtia Winnerdy<sup>1</sup>, Shankar Balasubramanian<sup>2,3</sup> and Anh Tuân Phan\*

<sup>1</sup> School of Physical and Mathematical Sciences, Nanyang Technological University, Singapore 637371

<sup>2</sup> Department of Chemistry, University of Cambridge, CB2 1EW, UK

<sup>3</sup> Cancer Research UK Cambridge Institute, University of Cambridge, Li Ka Shing Centre, Cambridge CB2 0RE, UK

\* To whom correspondence should be addressed. Tel: (+65) 6514 1915; Fax: (+65) 6795 7981; Email: [phantuan@ntu.edu.sg](mailto:phantuan@ntu.edu.sg)

#: The authors wish it to be known that, in their opinion, the first two authors should be regarded as joint First Authors.

## SUPPLEMENTARY DATA

**Keywords:** DNA structures · G-quadruplexes · NMR spectroscopy · PARP1 · BRCA mutation

## SUPPORTING INFORMATION CONTENTS

**Fig S1** - G-quadruplex forming sequences identified in the *PARP1* promoter by G4-seq approach

**Fig S2** - Imino proton resonance assignments of *TP3*

**Fig S3** - Aromatic proton resonance assignments of *TP3*

**Fig S4** - Time evolution of *TP3* monomers and higher order aggregates at room temperature

**Fig S5** - Superimposition of normalized CD and UV melting curves of *TP3*

**Fig S6** - Imino proton spectra region of *TP3* and mutated *TP3* sequences

**Fig S7** - CD spectrum of *TP3* (6  $\mu$ M) and *TP3-T6* (6  $\mu$ M and 250  $\mu$ M)

**Fig S8** - Imino (H1) and aromatic (H8) proton assignments for the *TP3-T6* sequence

**Fig S9** - Imino (H1) proton resonance for G2 of the *TP3-T6* sequence

**Fig S10** - Unambiguous assignment of thymine 20 by substitution of deoxyuridine (dU) for dT

**Fig S11** - NOESY spectrum of *TP3-T6* (mixing time, 300 ms).

**Fig S12** - NOESY spectrum of *TP3-T6* showing H1-H1 through space correlations labeled as indicated on the spectrum and H8-H8 cross-peaks showing sequential connection

**Fig S13** - Imino proton spectrum of *TP3-T6* recorded after 20 min and 2 hour exposure in D<sub>2</sub>O

**Fig S14** - NOESY spectrum of *TP3-T6* (mixing time, 250 ms) at 10°C in 90% H<sub>2</sub>O and 10% D<sub>2</sub>O

**Fig S15** - Normalized CD melting curves of *TP3-T6* and sequences mutated at specified positions

**A**

| Sequence Name | Sequence (5'-3')                 | Position from TSS |
|---------------|----------------------------------|-------------------|
| TP1           | TGGGACAGACAATCAAAGGGGTGGCGCCGG   | -172 (-)          |
| AP2           | AGGGGGAGGGGTTGGGGGTAAAATTAGTTGTG | -222 (-)          |
| TP3           | TGGGGGCCGAGGCGGGGCTTGGG          | -125 (+)          |

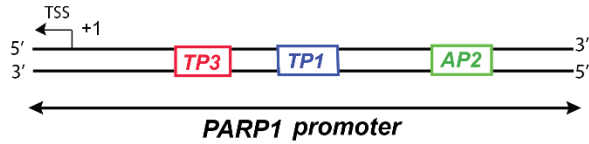**B**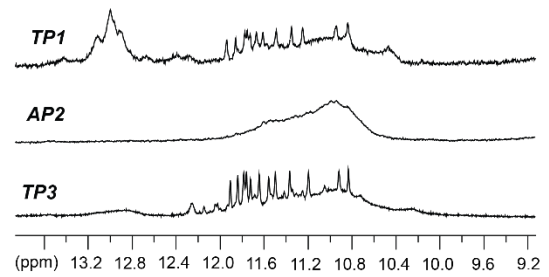

**Figure S1.** A. G-quadruplex forming sequences identified in the *PARP1* promoter by G4-seq approach and their respective locations from the transcription start site (TSS). The TP3 sequence, identified, is the closest to the TSS. B. <sup>1</sup>H-NMR spectra displaying the imino proton resonances of sequences identified by G4-seq

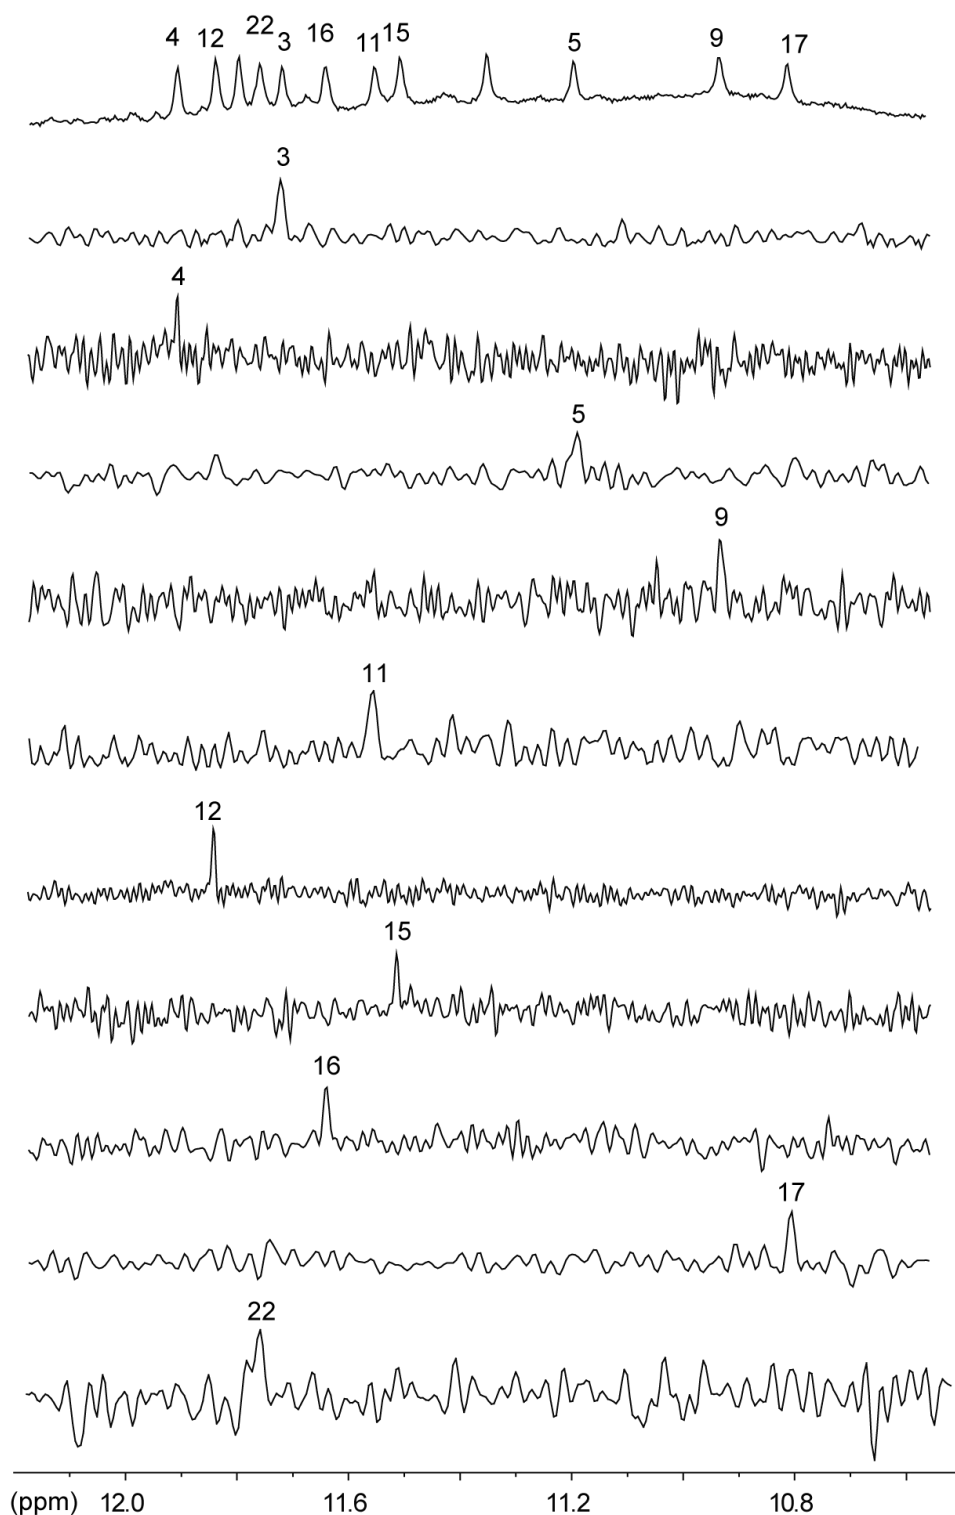

**Figure S2.** Imino proton resonance assignments of *TP3* indicated on the reference spectrum (top). Below are the individual spectra of 4%  $^{15}\text{N}$  labeled guanines at indicated positions. The imino protons of G21 and G23 (which were not labelled), could be assigned by elimination and extrapolation from the assignment *TP3-T6* (see below).

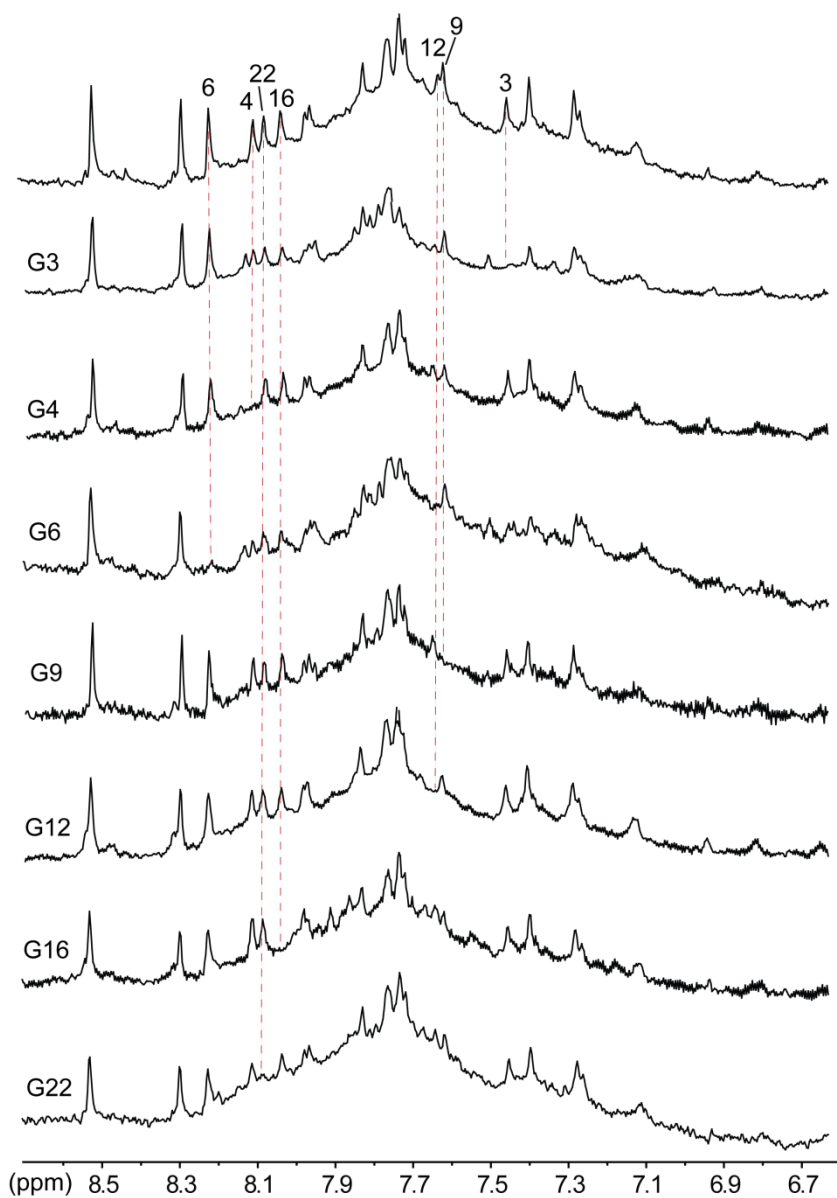

**Figure S3.** Aromatic proton resonance assignments of *TP3* indicated on the reference spectrum (top). Below are the individual spectra of  $^2\text{H}$ -labeled guanines at indicated positions.

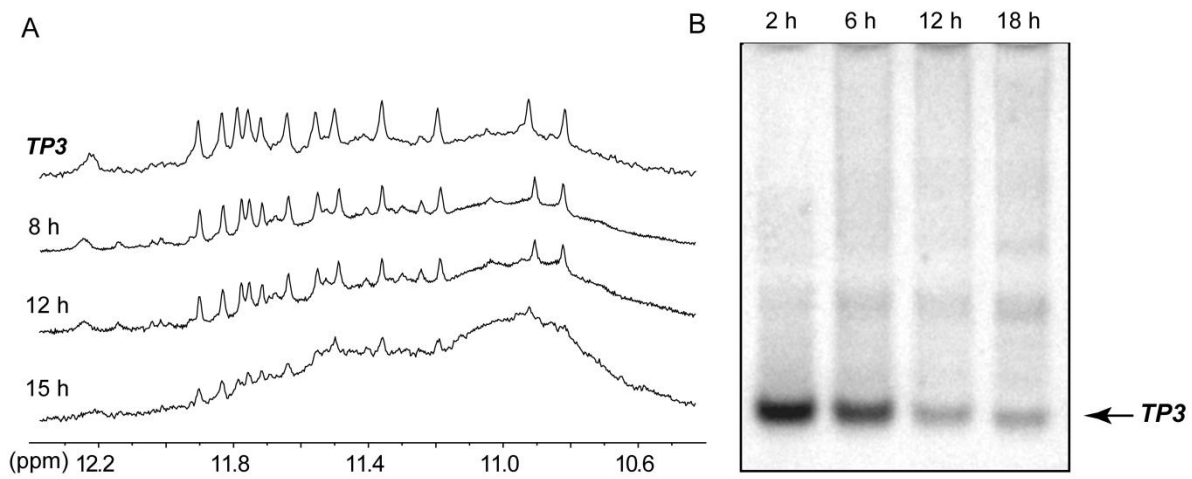

**Figure S4.** Time evolution of *TP3* monomers and higher order aggregates at room temperature **A.** Imino proton resonances of *TP3* at varying time intervals **B.** Time-dependent native PAGE analysis of *TP3*.

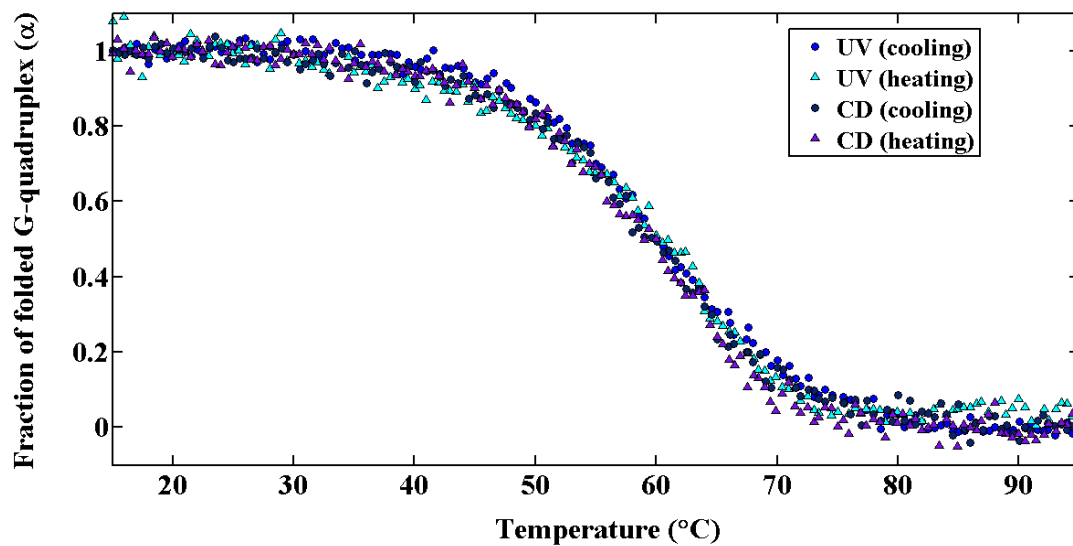

**Figure S5.** Superimposition of normalized CD and UV melting curves of *TP3* in 70 mM KCl and 20 mM KPi (pH = 7.0) with  $T_m = 59.6^\circ\text{C}$  as deduced from the UV and CD melting curves. Both are comparable, with a difference of less than  $1^\circ\text{C}$ . The sample concentration used is  $\sim 5$   $\mu\text{M}$  at which *TP3* predominantly remains as a monomer.

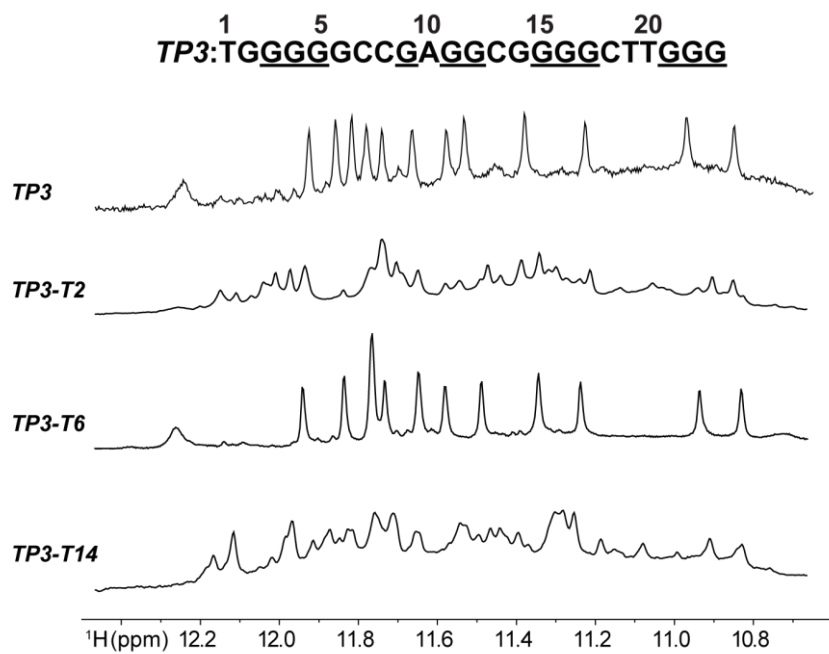

**Figure S6.** Imino proton spectra region of *TP3* and mutated *TP3* sequences (**G to T substitution at indicated positions**).



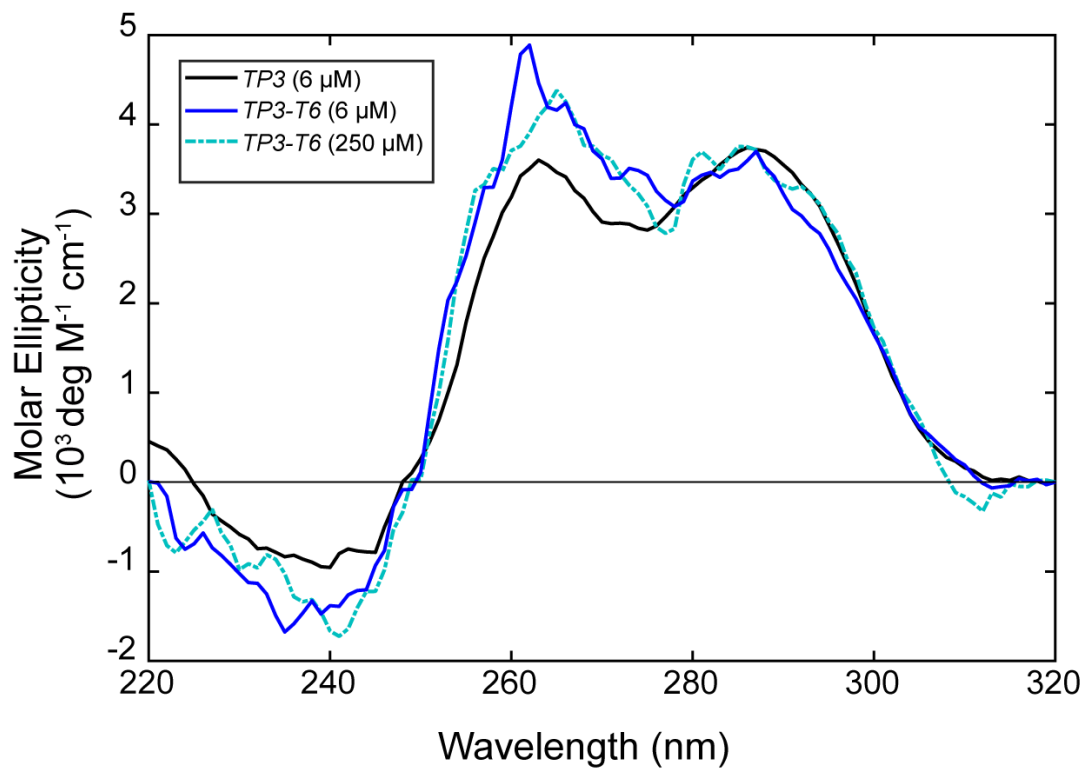

**Figure S7.** CD spectra of *TP3*, measured at a concentration of 6 μM, and *TP3-T6*, measured at concentrations of 6 μM and 250 μM respectively. All CD spectra display a (3+1) hybrid G-quadruplex, with 2 positive peaks at 265 and 290 nm and a trough at 240 nm in 70 mM KCl, 20 mM KPi (pH 7).

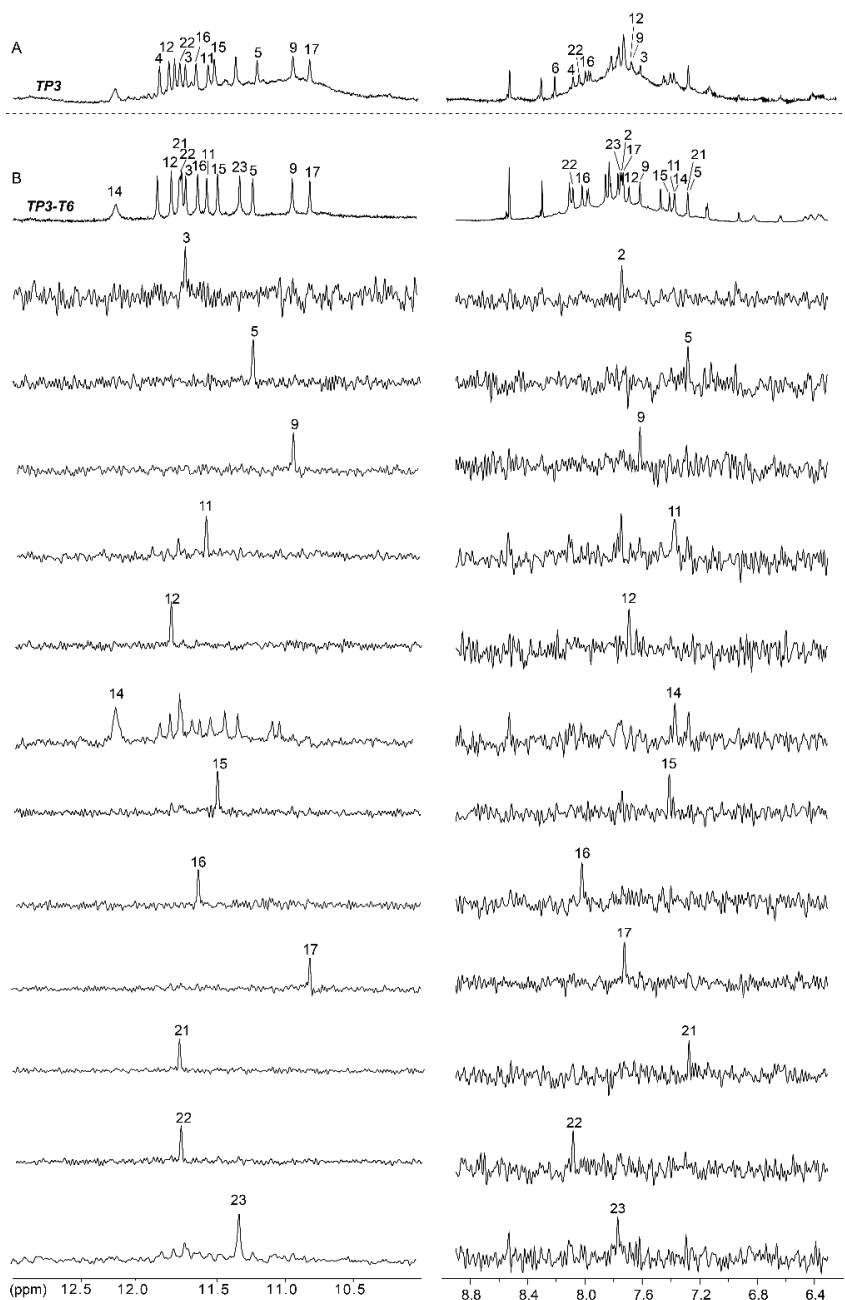

**Figure S8.** Imino (H1) and aromatic (H8) proton assignments for the *TP3-T6* sequence. A. Imino (H1) and aromatic (H8) proton assignments indicated on the reference spectrum for *TP3*. The imino proton of G4 (which was not labelled), could be assigned by elimination and extrapolation from the assignment *TP3*. B. Imino (H1) and aromatic (H8) proton assignments indicated on the reference spectrum on top for *TP3-T6*. Below are the individual spectra of *TP3-T6* with 4%  $^{15}\text{N}$  labeled guanine bases at indicated positions.  $^{15}\text{N}$ -labeling was carried out for most guanine residues of *TP3-T6* and *TP3*. Due to the high similarity of NMR spectral patterns, *TP3-T6* and *TP3* were deduced to have a highly similar fold and therefore, assignments were extrapolated between spectra for *TP3-T6* and *TP3*.  $^{15}\text{N}$ -labeling was carried out for G14 which was not part of the G-quadruplex core. Additional peaks corresponding to other guanine residues were observed for the individual spectrum of G14 due to the natural abundance of  $^{15}\text{N}$  as a result of the accumulation of a large number of scans.

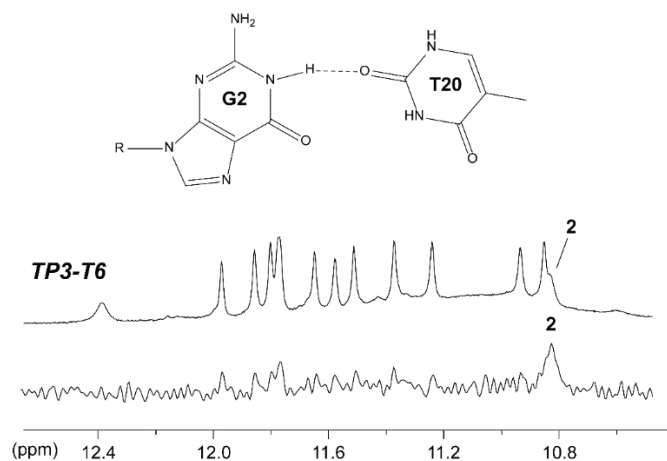

**Figure S9.** Imino (H1) proton resonance for G2 of the *TP3-T6* sequence resulting from the hydrogen bonding of G2 with the neighboring T20 residue as shown above. Spectra were recorded at 10°C in order to visualize the G2 peak.

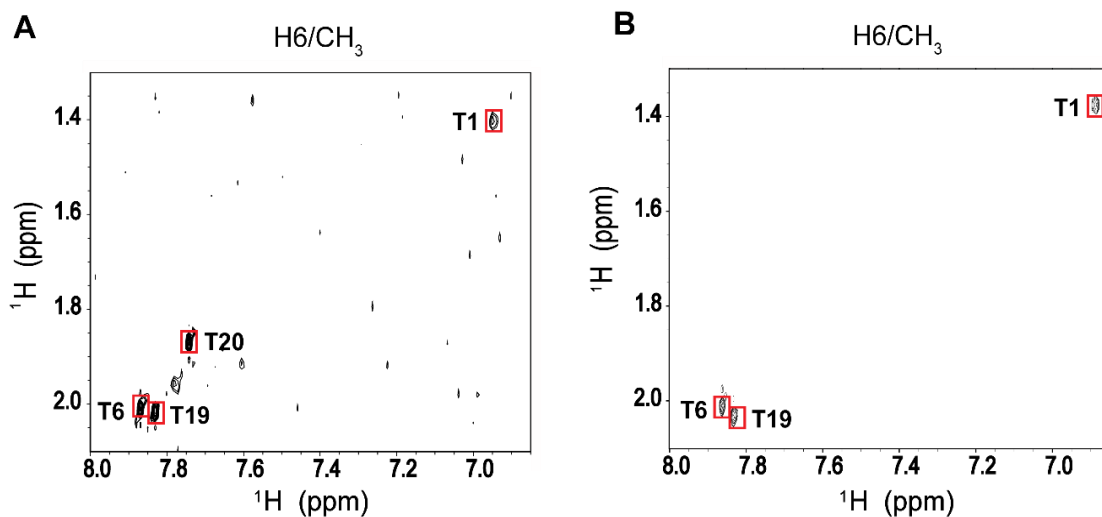

**Figure S10.** A. Unambiguous assignment of thymine 20 by substitution of deoxyuridine (dU) for dT at position 20. A. All four H6-CH<sub>3</sub> cross peaks corresponding to the four thymines in the sequence are observed in the TOCSY spectrum for *TP3-T6*. B. No H6-CH<sub>3</sub> cross peak is observed for *TP3-T6-U20* where dU is substituted for dT at position 20.

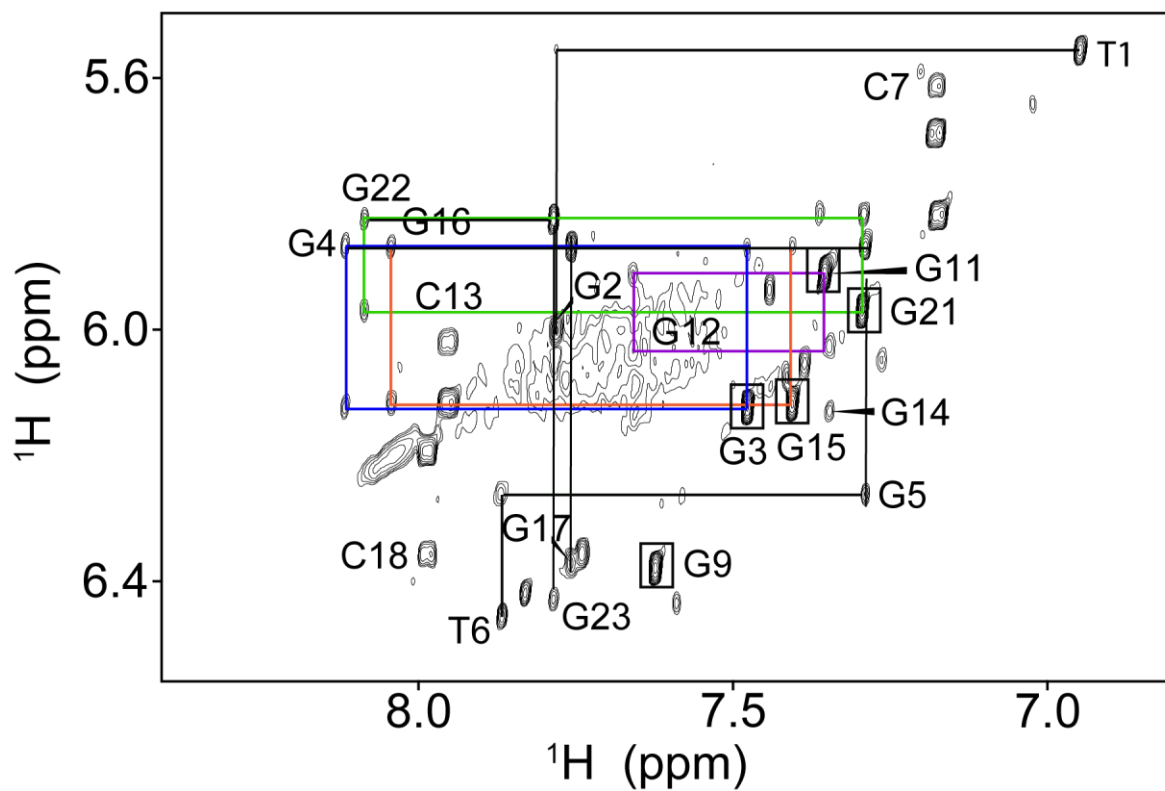

**Figure S11.** NOESY spectrum of *TP3-T6* (mixing time, 300 ms). Intra-residue NOE correlations are labeled according to their respective nucleotide number. Cross-peaks of strong intensity are framed in black and represent residues 3, 9, 11, 15, and 21 which adopt the *syn* glycosilic orientation. Sequential *syn*-to-*anti* (3-4, 11-12, 15-16 and 21-22) walk traced by blue, magenta, red and green rectangles respectively. Anti-to-anti connectivities that are present are also traced in black.

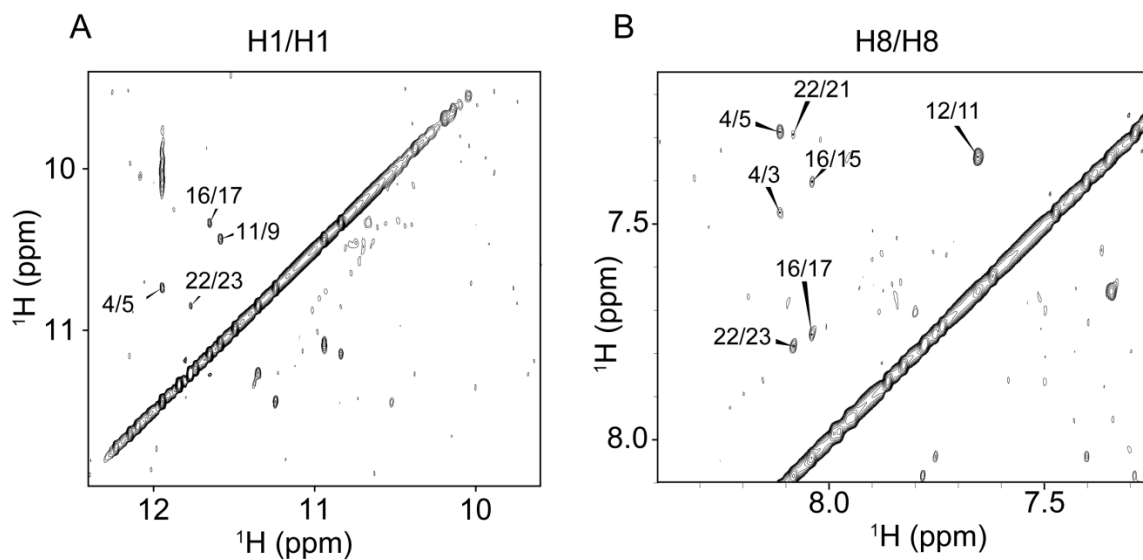

**Figure S12.** A. NOESY spectrum of *TP3-T6* showing H1-H1 through space correlations labeled as indicated on the spectrum. Medium intensity cross peaks for the guanine pairs (G4/G5, G9/G11, G16/G17 and G22/G23) in adjacent tetrads is observed confirming same polarity for the central and bottom tetrad (clockwise) and opposite polarity of the top tetrad (anticlockwise). B. H8-H8 cross-peaks showing sequential connection.

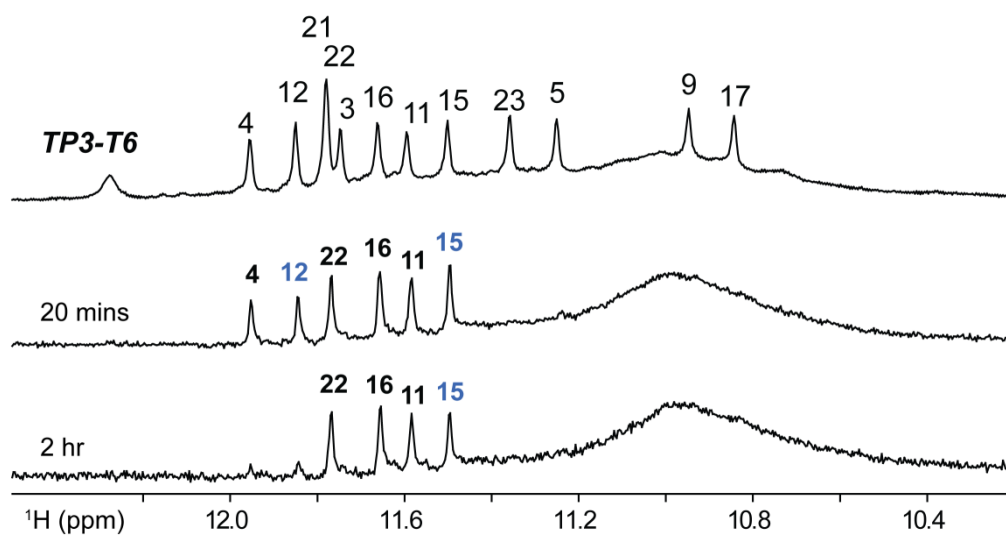

**Figure S13.** Imino proton spectrum of *TP3-T6* recorded after 20 min and 2 hour exposure in  $\text{D}_2\text{O}$ , showing protected residues corresponding to the middle tetrad (in black). Residues in blue are also protected and belong to the top tetrad.

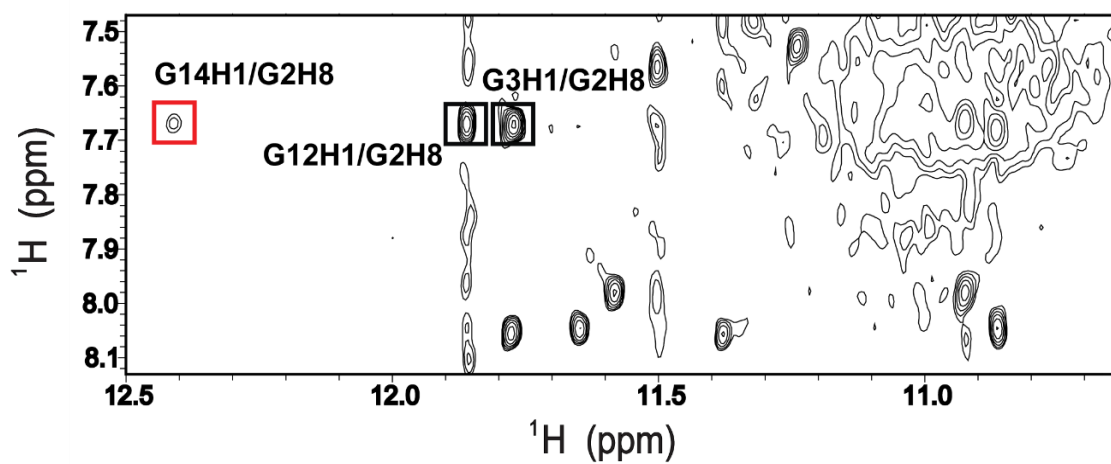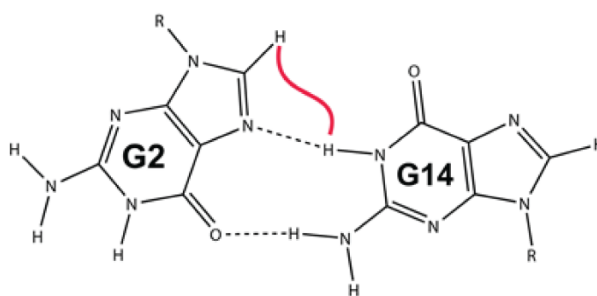

**Figure S14.** NOESY spectrum of *TP3-T6* (mixing time, 250 ms) at 10°C in 90% H<sub>2</sub>O and 10% D<sub>2</sub>O, showing interaction between G2 and G14 guanines and G2 with guanines (G3 and G12) forming the top tetrad.

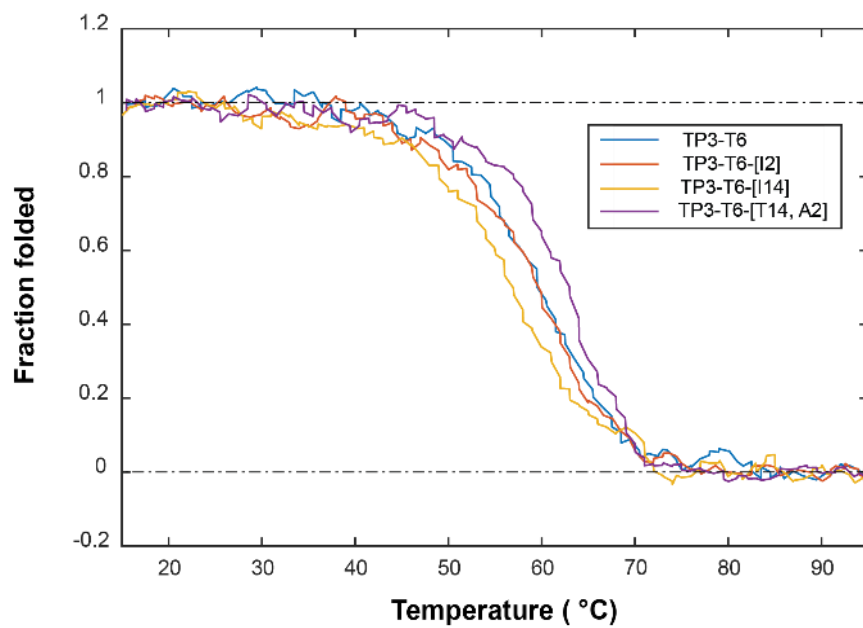

**Figure S15.** Normalized CD melting curves of *TP3-T6* and sequences mutated at specified positions in 70 mM KCl and 20 mM KPi (pH = 7.0). Cooling curves are displayed with 5-point averaging.
